# Supplementary material
Source: PubMed Central journal article supplement (PMC3662271)
Supplement: supp_80.15.1424_Appendices_e-1-4.pdf [file supp_80.15.1424_Appendices_e-1-4.pdf]

## Appendices e-1 through e-4

### Appendix e-1: Search strategy – Cochrane

#### Current Search History

| ID  | Search                                                                                                                                                                                                                                                                                                           | Hits  | Edit                 | Delete                 |
|-----|------------------------------------------------------------------------------------------------------------------------------------------------------------------------------------------------------------------------------------------------------------------------------------------------------------------|-------|----------------------|------------------------|
| #1  | MeSH descriptor <b>Neurocysticercosis</b> explode all trees                                                                                                                                                                                                                                                      | 21    | <a href="#">edit</a> | <a href="#">delete</a> |
| #2  | MeSH descriptor <b>Brain Diseases</b> , this term only                                                                                                                                                                                                                                                           | 294   | <a href="#">edit</a> | <a href="#">delete</a> |
| #3  | MeSH descriptor <b>Cysticercosis</b> , this term only                                                                                                                                                                                                                                                            | 18    | <a href="#">edit</a> | <a href="#">delete</a> |
| #4  | MeSH descriptor <b>Subarachnoid Space</b> explode all trees                                                                                                                                                                                                                                                      | 125   | <a href="#">edit</a> | <a href="#">delete</a> |
| #5  | (#3 AND ( #2 OR #4 ))                                                                                                                                                                                                                                                                                            | 10    | <a href="#">edit</a> | <a href="#">delete</a> |
| #6  | <u>neurocysticercosis OR "cerebral cysticercosis" OR "brain cysticercosis" OR "intraventricular neurocysticercosis" OR "intraventricular cysticercosis" OR "intraventricular cysticerci" OR "intraventricular cysticercus" OR "subarachnoid cysticercosis"</u>                                                   | 43    | <a href="#">edit</a> | <a href="#">delete</a> |
| #7  | (#1 OR #5 OR #6)                                                                                                                                                                                                                                                                                                 | 43    | <a href="#">edit</a> | <a href="#">delete</a> |
| #8  | MeSH descriptor <b>Antiparasitic Agents</b> , this term only                                                                                                                                                                                                                                                     | 39    | <a href="#">edit</a> | <a href="#">delete</a> |
| #9  | MeSH descriptor <b>Anthelmintics</b> , this term only                                                                                                                                                                                                                                                            | 238   | <a href="#">edit</a> | <a href="#">delete</a> |
| #10 | MeSH descriptor <b>Albendazole</b> explode all trees                                                                                                                                                                                                                                                             | 226   | <a href="#">edit</a> | <a href="#">delete</a> |
| #11 | MeSH descriptor <b>Praziquantel</b> explode all trees                                                                                                                                                                                                                                                            | 143   | <a href="#">edit</a> | <a href="#">delete</a> |
| #12 | MeSH descriptor <b>Anticonvulsants</b> , this term only                                                                                                                                                                                                                                                          | 1432  | <a href="#">edit</a> | <a href="#">delete</a> |
| #13 | MeSH descriptor <b>Steroids</b> , this term only                                                                                                                                                                                                                                                                 | 416   | <a href="#">edit</a> | <a href="#">delete</a> |
| #14 | MeSH descriptor <b>Hydrocortisone</b> , this term only                                                                                                                                                                                                                                                           | 3494  | <a href="#">edit</a> | <a href="#">delete</a> |
| #15 | MeSH descriptor <b>Prednisone</b> explode all trees                                                                                                                                                                                                                                                              | 2328  | <a href="#">edit</a> | <a href="#">delete</a> |
| #16 | MeSH descriptor <b>Prednisolone</b> , this term only                                                                                                                                                                                                                                                             | 1521  | <a href="#">edit</a> | <a href="#">delete</a> |
| #17 | MeSH descriptor <b>Dexamethasone</b> explode all trees                                                                                                                                                                                                                                                           | 1693  | <a href="#">edit</a> | <a href="#">delete</a> |
| #18 | <u>antiparasitic* OR anthelmintic* OR anthelmintic* OR anthelminthic* OR anthelminthic* OR cysticidal* OR antiseizure* OR anticonvulsant* OR antiepileptic* OR albendazole OR albenza OR praziquant?l OR biltricide OR steroid* OR hydrocortisone OR prednisone OR prednisolone OR dexamethasone OR decadron</u> | 27780 | <a href="#">edit</a> | <a href="#">delete</a> |
| #19 | (#8 OR #9 OR #10 OR #11 OR #12 OR #13 OR #14 OR #15 OR #16 OR #17 OR #18)                                                                                                                                                                                                                                        | 27784 | <a href="#">edit</a> | <a href="#">delete</a> |
| #20 | (#7 AND #19), from 2006 to 2008                                                                                                                                                                                                                                                                                  | 2     | <a href="#">edit</a> | <a href="#">delete</a> |

### Appendix e-2: Search Strategy – EMBASE

Database: EMBASE <1980 to 2008 Week 02>

Search Strategy:

- 
- 1 Neurocysticercosis/ (1104)
  - 2 Brain Cysticercosis/ (257)
  - 3 cerebral cysticercosis.mp. (171)

4 intraventricular cysticercosis.mp. (24)  
5 intraventricular cysticer\$2.mp. (1)  
6 intraventricular neurocysticercosis.mp. (9)  
7 subarachnoid cysticercosis.mp. (3)  
8 subarachnoid space/ (2223)  
9 Cysticercosis/ (1292)  
10 8 and 9 (7)  
11 Neurocysticercosis.mp. (1343)  
12 or/1-7,10-11 (1604)  
13 Antiparasitic Agent/ (2008)  
14 antiparasitic\$.mp. (2992)  
15 anthelmintic agent/ or albendazole/ or albendazole sulfone/ or albendazole sulfoxide/  
(7264)  
16 Praziquantel/ (3986)  
17 (anthelmintic\$ or antihelminthic\$ or antihelmintic\$ or anthelminthic\$.mp. (5106)  
18 cysticidal\$.mp. (77)  
19 Anticonvulsive Agent/ (29434)  
20 antiseizure\$.mp. (287)  
21 anticonvulsant\$.mp. (16838)  
22 antiepileptic\$.mp. (11003)  
23 albendazole.mp. (5020)  
24 Praziquant?l.mp. (4092)  
25 biltricide.mp. (449)  
26 albenza.mp. (36)  
27 Steroid/ (50971)  
28 steroid\$.mp. (154596)  
29 dexamethasone/ or dexamethasone acetate/ or dexamethasone derivative/ or  
dexamethasone 17,21 dipropionate/ or dexamethasone isonicotinate/ or dexamethasone 21  
mesilate/ or dexamethasone plus tobramycin/ or dexamethasone sodium phosphate/ or  
dexamethasone 17 valerate/ or hydrocortisone/ or hydrocortisone acetate/ or hydrocortisone  
butyrate/ or hydrocortisone 17 butyrate 21 propionate/ or hydrocortisone plus urea/ or  
hydrocortisone sodium phosphate/ or hydrocortisone sodium succinate/ or hydrocortisone  
valerate/ or 18 hydroxyhydrocortisone/ or 6beta hydroxyhydrocortisone/ or 16alpha  
hydroxyprednisolone/ or prednisolone/ or prednisolone acetate/ or prednisolone derivative/ or  
prednisolone hemisuccinate/ or prednisolone 21 phosphate/ or prednisolone pivalate/ or  
prednisolone sodium phosphate/ or prednisolone sodium succinate/ or prednisolone sodium  
tetrahydrophthalate/ or prednisolone 3 sulfobenzoate/ or prednisone/ or prednisone acetate/  
(210290)  
30 decadron.mp. (1618)  
31 (hydrocortisone or prednisone or prednisolone or dexamethasone).mp. (220606)  
32 or/13-31 (394710)  
33 and/12,32 (813)  
34 limit 33 to (human and yr="2006 - 2008") (111)  
35 limit 34 to (book or conference paper or editorial or erratum or letter or note or proceeding  
or report or short survey) (22)  
36 34 not 35 (89)

### Appendix e-3: Search Strategy – MEDLINE

Database: Ovid MEDLINE(R) <1966 to June Week 4 2006>

Search Strategy:

- 
- 1 exp Neurocysticercosis/ (670)
  - 2 exp Cysticercosis/ (3575)
  - 3 exp Brain Diseases/ (617257)
  - 4 2 and 3 (1374)
  - 5 (neurocysticercosis or cerebral cysticercosis or brain cysticercosis).mp. (1370)
  - 6 1 or 4 or 5 (2021)
  - 7 exp Antiparasitic Agents/ (137662)
  - 8 exp Anthelmintics/ (39905)
  - 9 cysticidal.mp. (72)
  - 10 exp Anticonvulsants/ (105138)
  - 11 albenza.mp. or exp Albendazole/ (2024)
  - 12 exp Praziquantel/ (2377)
  - 13 praziquantal.mp. (2)
  - 14 biltricide.mp. (81)
  - 15 exp steroids/ or exp corticosteroids/ (561849)
  - 16 exp Anti-Inflammatory Agents/ (303958)
  - 17 exp Hydrocortisone/ (48715)
  - 18 exp Prednisone/ (30565)
  - 19 exp Prednisolone/ (34177)
  - 20 exp Dexamethasone/ (35903)
  - 21 decadron.mp. (107)
  - 22 7 or 8 or 9 or 10 or 11 or 12 or 13 or 14 or 15 or 16 or 17 or 18 or 19 or 20 or 21 (906685)
  - 23 6 and 22 (526)
  - 24 limit 23 to humans (518)
  - 25 limit 24 to ("all adult (19 plus years)" and journal article) (306)
  - 26 exp neurocysticercosis/dt (143)
  - 27 exp cysticercosis/dt and 3 (335)
  - 28 26 or 27 (402)
  - 29 limit 28 to (humans and "all adult (19 plus years)" and journal article) (232)
  - 30 (albendazole or praziquantel).mp. (5216)
  - 31 6 and 30 (499)
  - 32 limit 31 to (humans and "all adult (19 plus years)" and journal article) (295)
  - 33 29 or 25 or 32 (353)
  - 34 from 33 keep 1-353 (353)

### Appendix e-4: Search Strategy – LILACS

01/16/2008

The "neurocysticercosis" terms were searched individually with the interventions ie. neurocysticercosis + antiparasitic agents, neurocysticercosis + anthelmintics, neurocysticercosis + cysticidal, brain cysticercosis + antiparasitic agents, brain cysticercosis + anthelmintics etc.
